# Supplementary material for: Iron Homeostasis Controls Myeloid Blood Cell Differentiation in Drosophila
Source: PubMed Central journal article supplement — Mol Cells. 2017 Dec 14;40(12):976–85. doi: 10.14348/molcells.2017.0287 (PMC5750716; doi:10.14348/molcells.2017.0287), 2017-12-14
Supplement: molce-40-12-976s1.pdf [file molce-40-12-976s1.pdf]

**Supplementary Table 1**

|                         |                   | <b>Genotype</b>                         | <b>Ratio of CZ</b>         | <b>The number of lymph gland</b> |    |
|-------------------------|-------------------|-----------------------------------------|----------------------------|----------------------------------|----|
| <b>Fig1</b>             | <b>C (Top)</b>    | Hml-gal4 UAS-GFP x OreR_<br>Normal food | 25.89±8.21                 | 15                               |    |
|                         |                   | Hml-gal4 UAS-GFP x OreR_<br>BPS 100uM   | 20.5±6.52                  | 17                               |    |
|                         |                   | Hml-gal4 UAS-GFP x OreR_<br>BPS 200uM   | 21.24±7.28                 | 37                               |    |
|                         |                   | <b>Genotype</b>                         | <b>Crystal cell number</b> | <b>The number of lymph gland</b> |    |
|                         | <b>C (Bottom)</b> | Hml-gal4 UAS-GFP x OreR_<br>Normal food | 48±18                      | 28                               |    |
|                         |                   | Hml-gal4 UAS-GFP x OreR_<br>BPS 100uM   | 66±29                      | 37                               |    |
|                         |                   | Hml-gal4 UAS-GFP x OreR_<br>BPS 200uM   | 31±19                      | 45                               |    |
|                         |                   | <b>Genotype</b>                         | <b>Ratio of CZ</b>         | <b>The number of lymph gland</b> |    |
|                         | <b>D (Top)</b>    | Hml-gal4 UAS-GFP x OreR_<br>Normal food | 25.89±8.21                 | 15                               |    |
|                         |                   | Hml-gal4 UAS-GFP x OreR_<br>FAC 5mM     | 29.72±15.29                | 14                               |    |
|                         |                   | Hml-gal4 UAS-GFP x OreR_<br>FAC 10mM    | 30.2±13.34                 | 13                               |    |
|                         |                   | <b>Genotype</b>                         | <b>Crystal cell number</b> | <b>The number of lymph gland</b> |    |
|                         | <b>D (Bottom)</b> | Hml-gal4 UAS-GFP x OreR_<br>Normal food | 48±18                      | 28                               |    |
|                         |                   | Hml-gal4 UAS-GFP x OreR_<br>FAC 5mM     | 40±17                      | 29                               |    |
|                         |                   | Hml-gal4 UAS-GFP x OreR_<br>FAC 10mM    | 40±22                      | 24                               |    |
|                         |                   | <b>Genotype</b>                         | <b>Crystal cell number</b> | <b>The number of lymph gland</b> |    |
|                         | <b>Fig2</b>       | <b>B</b>                                | NP1-gal4 x OreR            | 90±35                            | 60 |
|                         |                   |                                         | NP1-gal4 x Mvl RNAi        | 108±45                           | 11 |
| NP1-gal4 x mfrn RNAi    |                   |                                         | 115±73                     | 14                               |    |
| NP1-gal4 x Irp-1A RNAi  |                   |                                         | 104±38                     | 13                               |    |
| NP1-gal4 x Irp-1B RNAi  |                   |                                         | 86±28                      | 13                               |    |
| NP1-gal4 x Fer1HCH RNAi |                   |                                         | 286±93                     | 16                               |    |

|             |                   |                                       |                            |                                  |
|-------------|-------------------|---------------------------------------|----------------------------|----------------------------------|
|             |                   | NP1-gal4 x Fer2LcH RNAi               | 111±30                     | 14                               |
|             |                   | NP1-gal4 x Tsf1 RNAi                  | 83±39                      | 14                               |
|             |                   | Np1-gal4 xTsf3 RNAi                   | 66±44                      | 17                               |
|             |                   | <b>Genotype</b>                       | <b>The ratio of CZ</b>     | <b>The number of lymph gland</b> |
|             | <b>C</b>          | NP1-gal4 x OreR                       | 22.82±7.76                 | 60                               |
|             |                   | NP1-gal4 x Fer1HCH RNAi               | 18.20±5.79                 | 16                               |
|             |                   | <b>Genotype</b>                       | <b>Crystal cell number</b> | <b>The number of lymph gland</b> |
|             | <b>D</b>          | Mvl-gal4 x OreR                       | 158±57                     | 23                               |
|             |                   | Mvl-gal4 x Fer1HCH RNAi               | 241±106                    | 17                               |
|             |                   | <b>Genotype</b>                       | <b>Ratio of CZ</b>         | <b>The number of lymph gland</b> |
| <b>Fig4</b> | <b>A (Top)</b>    | Hml-gal4 UAS-GFP x OreR               | 22.2±16.57                 | 26                               |
|             |                   | Hml-gal4 UAS-GFP x Fer1HCH RNAi       | 39.09±14.70                | 12                               |
|             |                   | <b>Genotype</b>                       | <b>Crystal cell number</b> | <b>The number of lymph gland</b> |
|             | <b>A (Bottom)</b> | Hml-gal4 UAS-GFP x OreR               | 66±33                      | 41                               |
|             |                   | Hml-gal4 UAS-GFP x Fer1HCH RNAi       | 226±94                     | 31                               |
|             |                   | <b>Genotype</b>                       | <b>Ratio of CZ</b>         | <b>The number of lymph gland</b> |
|             | <b>B (Top)</b>    | Pxn-gal4 UAS-GFP x OreR               | 49.64±14.79                | 21                               |
|             |                   | Pxn-gal4 UAS-GFP x Fer1HCH RNAi       | 65.19±18.7                 | 19                               |
|             |                   | <b>Genotype</b>                       | <b>Crystal cell number</b> | <b>The number of lymph gland</b> |
|             | <b>B (Bottom)</b> | Pxn-gal4 UAS-GFP x OreR               | 101±33                     | 22                               |
|             |                   | Pxn-gal4 UAS-GFP x Fer1HCH RNAi       | 247±143                    | 21                               |
|             |                   | <b>Genotype</b>                       | <b>Ratio of CZ</b>         | <b>The number of lymph gland</b> |
|             | <b>C (Top)</b>    | HLT-gal4 x OreR                       | 25.56±17.7                 | 16                               |
|             |                   | HLT-gal4 x Fer1HCH RNAi               | 46.36±19                   | 22                               |
|             |                   | <b>Genotype</b>                       | <b>Crystal cell number</b> | <b>The number of lymph gland</b> |
|             | <b>C (Bottom)</b> | HLT-gal4 x OreR                       | 60±30                      | 37                               |
|             |                   | HLT-gal4 x Fer1HCH RNAi               | 115±50                     | 24                               |
|             |                   | <b>Genotype</b>                       | <b>Ratio of MZ</b>         | <b>The number of lymph gland</b> |
|             | <b>D (Top)</b>    | Dome-meso-gal4 UAS-GFP x OreR         | 49.2±12.28                 | 24                               |
|             |                   | Dome-meso-gal4 UAS-GFP x Fer1HCH RNAi | 36.94±12.9                 | 21                               |
|             |                   | <b>Genotype</b>                       | <b>Crystal cell number</b> | <b>The number of lymph gland</b> |
|             | <b>D (Bottom)</b> | Dome-meso-gal4 UAS-GFP x OreR         | 69±31                      | 24                               |
|             |                   | Dome-meso-gal4 UAS-GFP x Fer1HCH RNAi | 30±17                      | 31                               |

|          |  | <b>Genotype</b>          | <b>Crystal cell number</b> | <b>The number of lymph gland</b> |
|----------|--|--------------------------|----------------------------|----------------------------------|
| <b>E</b> |  | nSyb-gal4 x OreR         | 123±47                     | 17                               |
|          |  | nSyb-gal4 x Fer1HCH RNAi | 118±44                     | 24                               |
|          |  | <b>Genotype</b>          | <b>Crystal cell number</b> | <b>The number of lymph gland</b> |
| <b>F</b> |  | ppl-gal4 x OreR          | 49±27                      | 19                               |
|          |  | ppl-gal4 x Fer1HCH Ri    | 76±53                      | 12                               |
